# Supplementary material
Source: PubMed Central journal article supplement (PMC6347016)
Supplement: NIHMS996830-supplement-1.pdf [file NIHMS996830-supplement-1.pdf]

Supplemental Table 1 : Defintions of various causes of death

| Cause of death       | Code of primary cause of death                   |
|----------------------|--------------------------------------------------|
| Cadiovascular        | 23: Myocardial Infarction, Acute                 |
|                      | 25: Pericarditis, Incl. Cardiac Tamponade        |
|                      | 26: Atherosclerotic Heart Disease                |
|                      | 27: Cardiomyopathy                               |
|                      | 28: Cardiac Arrhythmia                           |
|                      | 29: Cardiac Arrest, Cause Unknown                |
|                      | 30: Valvular Heart Disease                       |
|                      | 31: Pulmonary Edema Due To Exogenous Fluid       |
|                      | 32: Congestive heart failure                     |
|                      | 37: Ischemic Brain Damage/Anoxic Enecephalopathy |
| Infectious           | 33: Septicemia due to internal vascular access   |
|                      | 34: Septicemia due to vascular access catheter   |
|                      | 50: Septicemia, Due To Peritonitis               |
|                      | 52: Septicemia, Other                            |
|                      | 53: Pulmonary Infection (Bacterial)              |
|                      | 54: Pulmonary Infection (Fungal))                |
|                      | 55: Pulmonary Infection (Other)                  |
|                      | 56: Viral Infection, Cmv                         |
|                      | 57: Viral Infection, Other (Not 64 Or 65)        |
|                      | 58: Tuberculosis                                 |
| 60: Infection, Other |                                                  |

Malignant

- 61: Cardiac infection (endocarditis)
- 62: Pulmonary infection (pneumonia, influenza)

Other

- 83: Malignant Disease (Not 82)
- 24: Hyperkalemia
- 35: Pulmonary Embolus
- 38: Hemorrhage From Transplant Site
- 39: Hemorrhage From Vascular Access
- 41: Hemorrhage From Ruptured Vascular Aneurysm
- 42: Hemorrhage From Surgery (Not 38,39 Or 40)
- 43: Other Hemorrhage (Not Codes 38-42,72)
- 44: Mesenteric Infarction/Ischemic Bowel
- 64: Hepatitis B
- 65: Other Viral Hepatitis
- 66: Liver-Drug Toxicity
- 67: Cirrhosis
- 68: Polycystic Liver Disease
- 69: Liver Failure, Cause Unknown Other
- 71: Hepatitis C
- 72: Gastro-Intestinal Hemorrhage
- 73: Pancreatitis
- 75: Perforation Of Peptic Ulcer
- 76: Perforation Of Bowel (Not 75)
- 78: Hyponatremia

79: Hyponatremia  
80: Bone Marrow Depression  
81: Cachexia  
84: Dementia, Incl. Dialysis Dementia, Alzheimers  
85: Seizures  
87: Chronic Obstructive Lung Disease (Copl)  
88: Complications Of Surgery  
89: Air Embolism  
90: Accident Related To Treatment  
91: Accident Unrelated To Treatment  
92: Suicide  
93: Drug Overdose (Street Drugs)  
94: Drug Overdose (Not 92 Or 93)  
95: Acidosis  
97: Hypothyroidism  
100: Hypoglycemia  
101: Hyperglycemia  
102: Diabetic coma  
104: Withdrawal from dialysis/uremia

Unknown/missing

99: Unknown

No code

---

Supplemental Table 2: Trend of one- year cause-specific and all-cause mortality

| <i>Cause of death</i> | <i>Transplantation year</i> |      |      |      |      |      |      |      |      |      |      |      |      |      |      |      |      |      |      |
|-----------------------|-----------------------------|------|------|------|------|------|------|------|------|------|------|------|------|------|------|------|------|------|------|
|                       | 1996                        | 1997 | 1998 | 1999 | 2000 | 2001 | 2002 | 2003 | 2004 | 2005 | 2006 | 2007 | 2008 | 2009 | 2010 | 2011 | 2012 | 2013 | 2014 |
| Cardiovascular        | 1.21                        | 1.20 | 0.80 | 0.91 | 0.78 | 0.94 | 0.92 | 0.92 | 0.86 | 1.02 | 0.81 | 0.80 | 0.81 | 0.87 | 0.82 | 0.64 | 0.59 | 0.52 | 0.59 |
| Infectious            | 0.86                        | 0.59 | 0.54 | 0.50 | 0.50 | 0.67 | 0.51 | 0.46 | 0.50 | 0.59 | 0.60 | 0.54 | 0.53 | 0.58 | 0.50 | 0.45 | 0.41 | 0.28 | 0.29 |
| Malignant             | 0.08                        | 0.11 | 0.04 | 0.07 | 0.07 | 0.04 | 0.05 | 0.08 | 0.14 | 0.15 | 0.18 | 0.12 | 0.11 | 0.06 | 0.09 | 0.09 | 0.08 | 0.09 | 0.11 |
| Other                 | 0.61                        | 0.69 | 0.43 | 0.49 | 0.59 | 0.44 | 0.55 | 0.65 | 0.65 | 0.71 | 0.63 | 0.66 | 0.64 | 0.62 | 0.54 | 0.58 | 0.50 | 0.41 | 0.46 |
| All-cause mortality   | 4.05                        | 4.41 | 3.75 | 4.31 | 4.37 | 4.02 | 3.82 | 3.79 | 3.50 | 3.69 | 3.37 | 3.04 | 2.90 | 3.12 | 2.83 | 2.83 | 2.58 | 2.41 | 2.53 |

Supplemental Table 3: Trend of ten-year cause-specific and all-cause mortality

| <i>Cause of death</i> | <i>Transplantation year</i> |       |       |       |       |       |       |       |       |       |
|-----------------------|-----------------------------|-------|-------|-------|-------|-------|-------|-------|-------|-------|
|                       | 1996                        | 1997  | 1998  | 1999  | 2000  | 2001  | 2002  | 2003  | 2004  | 2005  |
| Cardiovascular        | 4.53                        | 4.63  | 3.71  | 4.15  | 3.90  | 3.99  | 4.05  | 3.69  | 3.21  | 3.14  |
| Infectious            | 2.42                        | 1.93  | 2.03  | 2.04  | 2.33  | 2.23  | 2.03  | 2.09  | 2.23  | 2.11  |
| Malignant             | 1.53                        | 1.38  | 1.36  | 1.30  | 1.49  | 1.42  | 1.35  | 1.40  | 1.62  | 1.86  |
| Other                 | 2.71                        | 2.61  | 2.60  | 2.68  | 2.63  | 2.65  | 2.58  | 2.93  | 2.89  | 3.05  |
| All-cause             | 28.06                       | 28.55 | 27.15 | 27.87 | 28.05 | 27.96 | 26.55 | 27.31 | 25.91 | 26.98 |

Supplemental Table 4. Transplantation year and *one*-year cause of death with a functioning graft in kidney transplant recipients, stratified by use of depleting drugs in induction

| Transplantation year | Hazard ratio (95% CI) from adjusted model* |                               |                           |                          |                      |                        |                        |                                |                               |                           |                          |                      |                        |                        |
|----------------------|--------------------------------------------|-------------------------------|---------------------------|--------------------------|----------------------|------------------------|------------------------|--------------------------------|-------------------------------|---------------------------|--------------------------|----------------------|------------------------|------------------------|
|                      | Any depleting drug in induction            |                               |                           |                          |                      |                        |                        | No depleting drug in induction |                               |                           |                          |                      |                        |                        |
|                      | All-cause <sup>[1]</sup>                   | Cardiovascular <sup>[2]</sup> | Infections <sup>[2]</sup> | Malignant <sup>[2]</sup> | Other <sup>[2]</sup> | Unknown <sup>[2]</sup> | Missing <sup>[2]</sup> | All-cause <sup>[1]</sup>       | Cardiovascular <sup>[2]</sup> | Infections <sup>[2]</sup> | Malignant <sup>[2]</sup> | Other <sup>[2]</sup> | Unknown <sup>[2]</sup> | Missing <sup>[2]</sup> |
| 1996-2001            | 1 (ref.)                                   | 1 (ref.)                      | 1 (ref.)                  | 1 (ref.)                 | 1 (ref.)             | 1 (ref.)               | 1 (ref.)               | 1 (ref.)                       | 1 (ref.)                      | 1 (ref.)                  | 1 (ref.)                 | 1 (ref.)             | 1 (ref.)               | 1 (ref.)               |
| 2002-2007            | 0.65<br>(0.57, 0.74)                       | 0.59<br>(0.46, 0.76)          | 0.63<br>(0.45, 0.88)      | 1.50<br>(0.63, 3.55)     | 0.86<br>(0.60, 1.23) | 0.93<br>(0.61, 1.42)   | 0.50<br>(0.39, 0.63)   | 0.79<br>(0.73, 0.84)           | 0.89<br>(0.77, 1.03)          | 0.83<br>(0.69, 0.99)      | 1.28<br>(0.79, 2.07)     | 1.17<br>(0.98, 1.40) | 1.50<br>(1.17, 1.91)   | 0.48<br>(0.42, 0.54)   |
| 2008-2014            | 0.44<br>(0.39, 0.51)                       | 0.42<br>(0.33, 0.54)          | 0.47<br>(0.34, 0.65)      | 0.82<br>(0.35, 1.94)     | 0.64<br>(0.45, 0.91) | 0.68<br>(0.45, 1.02)   | 0.29<br>(0.23, 0.37)   | 0.60<br>(0.56, 0.65)           | 0.66<br>(0.57, 0.77)          | 0.63<br>(0.53, 0.76)      | 0.89<br>(0.54, 1.46)     | 0.97<br>(0.81, 1.15) | 1.57<br>(1.24, 1.98)   | 0.30<br>(0.26, 0.35)   |

\*Adjusted for age, sex, race

<sup>[1]</sup> Cox proportional hazard model

<sup>[2]</sup> Cause specific hazard model

Supplemental Table 5. Transplantation year and *ten*-year cause of death with a functioning graft in kidney transplant recipients, stratified by use of depleting drugs in induction

| Transplantation year | Hazard ratio (95% CI) from adjusted model* |                               |                           |                          |                      |                        |                        |                                |                               |                           |                          |                      |                        |                        |
|----------------------|--------------------------------------------|-------------------------------|---------------------------|--------------------------|----------------------|------------------------|------------------------|--------------------------------|-------------------------------|---------------------------|--------------------------|----------------------|------------------------|------------------------|
|                      | Any depleting drug in induction            |                               |                           |                          |                      |                        |                        | No depleting drug in induction |                               |                           |                          |                      |                        |                        |
|                      | All-cause <sup>[1]</sup>                   | Cardiovascular <sup>[2]</sup> | Infectious <sup>[2]</sup> | Malignant <sup>[2]</sup> | Other <sup>[2]</sup> | Unknown <sup>[2]</sup> | Missing <sup>[2]</sup> | All-cause <sup>[1]</sup>       | Cardiovascular <sup>[2]</sup> | Infectious <sup>[2]</sup> | Malignant <sup>[2]</sup> | Other <sup>[2]</sup> | Unknown <sup>[2]</sup> | Missing <sup>[2]</sup> |
| 1996                 | 1 (ref.)                                   | 1 (ref.)                      | 1 (ref.)                  | 1 (ref.)                 | 1 (ref.)             | 1 (ref.)               | 1 (ref.)               | 1 (ref.)                       | 1 (ref.)                      | 1 (ref.)                  | 1 (ref.)                 | 1 (ref.)             | 1 (ref.)               | 1 (ref.)               |
| 1997                 | 1.13 (0.96, 1.33)                          | 1.26 (0.88, 1.80)             | 1.41 (0.79, 2.49)         | 0.69 (0.37, 1.29)        | 1.04 (0.65, 1.66)    | 1.42 (0.90, 2.24)      | 1.06 (0.81, 1.38)      | 0.97 (0.91, 1.05)              | 0.92 (0.77, 1.11)             | 0.66 (0.51, 0.86)         | 0.94 (0.67, 1.33)        | 0.93 (0.73, 1.19)    | 1.17 (0.93, 1.48)      | 1.03 (0.93, 1.14)      |
| 1998                 | 0.95 (0.79, 1.14)                          | 0.77 (0.50, 1.18)             | 1.07 (0.56, 2.04)         | 0.64 (0.32, 1.26)        | 0.76 (0.44, 1.32)    | 1.69 (1.06, 2.68)      | 0.94 (0.70, 1.25)      | 0.92 (0.85, 0.99)              | 0.78 (0.65, 0.94)             | 0.74 (0.58, 0.95)         | 0.91 (0.65, 1.27)        | 0.94 (0.75, 1.19)    | 1.13 (0.90, 1.41)      | 0.95 (0.86, 1.05)      |
| 1999                 | 1.00 (0.83, 1.20)                          | 1.16 (0.78, 1.71)             | 0.83 (0.41, 1.67)         | 0.38 (0.16, 0.88)        | 0.94 (0.55, 1.60)    | 1.21 (0.73, 2.00)      | 1.05 (0.79, 1.40)      | 0.92 (0.86, 0.99)              | 0.82 (0.69, 0.99)             | 0.76 (0.59, 0.96)         | 0.94 (0.68, 1.30)        | 0.93 (0.74, 1.18)    | 1.34 (1.08, 1.66)      | 0.90 (0.82, 1.00)      |
| 2000                 | 1.01 (0.85, 1.20)                          | 0.84 (0.56, 1.24)             | 1.32 (0.73, 2.38)         | 0.85 (0.47, 1.54)        | 0.69 (0.40, 1.18)    | 1.18 (0.73, 1.90)      | 1.13 (0.87, 1.47)      | 0.91 (0.84, 0.97)              | 0.79 (0.66, 0.95)             | 0.79 (0.63, 1.00)         | 0.93 (0.67, 1.28)        | 0.95 (0.76, 1.19)    | 1.31 (1.06, 1.63)      | 0.88 (0.80, 0.97)      |
| 2001                 | 0.91 (0.77, 1.06)                          | 0.72 (0.50, 1.04)             | 1.29 (0.75, 2.22)         | 0.74 (0.43, 1.28)        | 0.96 (0.62, 1.50)    | 1.32 (0.86, 2.03)      | 0.83 (0.64, 1.07)      | 0.89 (0.83, 0.95)              | 0.82 (0.69, 0.98)             | 0.73 (0.58, 0.93)         | 0.87 (0.63, 1.20)        | 0.84 (0.66, 1.05)    | 1.42 (1.15, 1.75)      | 0.85 (0.77, 0.94)      |
| 2002                 | 0.79 (0.68, 0.92)                          | 0.59 (0.41, 0.83)             | 1.06 (0.63, 1.79)         | 0.55 (0.32, 0.93)        | 0.70 (0.45, 1.08)    | 1.24 (0.82, 1.87)      | 0.80 (0.63, 1.02)      | 0.81 (0.75, 0.87)              | 0.84 (0.71, 1.01)             | 0.63 (0.50, 0.81)         | 0.78 (0.56, 1.09)        | 0.85 (0.67, 1.07)    | 1.20 (0.96, 1.48)      | 0.75 (0.68, 0.83)      |
| 2003                 | 0.82 (0.72, 0.95)                          | 0.65 (0.47, 0.90)             | 0.81 (0.48, 1.37)         | 0.61 (0.37, 0.99)        | 0.64 (0.42, 0.97)    | 0.99 (0.66, 1.48)      | 0.97 (0.78, 1.21)      | 0.80 (0.74, 0.86)              | 0.68 (0.56, 0.82)             | 0.70 (0.55, 0.89)         | 0.74 (0.53, 1.04)        | 1.03 (0.82, 1.29)    | 1.42 (1.15, 1.76)      | 0.70 (0.63, 0.78)      |
| 2004                 | 0.72 (0.62, 0.82)                          | 0.51 (0.36, 0.70)             | 0.77 (0.46, 1.29)         | 0.49 (0.30, 0.81)        | 0.69 (0.46, 1.03)    | 0.88 (0.59, 1.31)      | 0.82 (0.66, 1.02)      | 0.77 (0.72, 0.83)              | 0.62 (0.52, 0.76)             | 0.79 (0.62, 1.00)         | 1.06 (0.78, 1.45)        | 0.97 (0.78, 1.22)    | 1.31 (1.06, 1.63)      | 0.65 (0.59, 0.73)      |
| 2005                 | 0.70 (0.61, 0.80)                          | 0.45 (0.33, 0.63)             | 0.78 (0.47, 1.28)         | 0.65 (0.41, 1.04)        | 0.72 (0.48, 1.06)    | 0.82 (0.55, 1.23)      | 0.78 (0.63, 0.97)      | 0.79 (0.73, 0.85)              | 0.61 (0.51, 0.74)             | 0.69 (0.54, 0.88)         | 1.02 (0.75, 1.40)        | 0.98 (0.79, 1.23)    | 1.39 (1.13, 1.72)      | 0.69 (0.62, 0.76)      |

\*Adjusted for age, sex, race

<sup>[1]</sup> Cox proportional hazard model

<sup>[2]</sup> Cause specific hazard model
